# Supplementary material for: Co-Inoculation of Trichoderma asperellum with Bacillus subtilis to Promote Growth and Nutrient Absorption in Marandu Grass
Source: Hindawi journal article supplement (doi:10.1155/2022/3228594), 2022-12-17
Supplement: f1 [file 3228594.f1.pdf]

## Supplementary material

**Table 1.** Composite soil properties before fertilization at a depth of 0-0.2 m

| Depth | Sandy              | Silt               | Clay               | pH               | O.M                | N                  | P                   | K                   | Ca                     | Mg                     | Ca+Mg                  | H+Al                   | CEC                    |
|-------|--------------------|--------------------|--------------------|------------------|--------------------|--------------------|---------------------|---------------------|------------------------|------------------------|------------------------|------------------------|------------------------|
| m     | g kg <sup>-1</sup> | g kg <sup>-1</sup> | g kg <sup>-1</sup> | H <sub>2</sub> O | g kg <sup>-1</sup> | g kg <sup>-1</sup> | mg.dm <sup>-3</sup> | mg.dm <sup>-3</sup> | cmolc.dm <sup>-3</sup> |
| 0-0.2 | 658                | 194                | 148                | 5.81             | 14.6               | 0.08               | 4                   | 10                  | 1.5                    | 0.3                    | 1.8                    | 4.95                   | 6.87                   |

**Table 2:** The influence of different factors/treatments on plant parameters.

|                | <i>P</i> Value |       |        |        |        |      |       |
|----------------|----------------|-------|--------|--------|--------|------|-------|
| FV             | RDM            | SDM   | LR     | Height | LA     | LER  | LapR  |
| Microorganisms | 0.01           | 0.01  | 0.01   | 0.01   | 0.01   | 0.01 | 0.01  |
| Doses (N)      | 0.01           | 0.007 | 0.01   | 0.01   | ns     | 0.01 | 0.01  |
| M x D          | ns             | ns    | ns     | 0.01   | 0.006  | ns   | 0.005 |
| Microorganisms | 0.002          | 0.003 | 0.0086 | 0.001  | 0.045  | 0.03 | 0.008 |
| Doses (P)      | 0.01           | 0.01  | 0.01   | 0.01   | 0.01   | 0.05 | 0.01  |
| M x D          | 0.03           | ns    | ns     | ns     | ns     | ns   | ns    |
| Microorganism  | 0.05           | 0.03  | 0.01   | 0.01   | 0.0001 | 0.01 | ns    |
| Doses (K)      | 0.01           | 0.01  | 0.01   | 0.01   | 0.0018 | 0.01 | 0.016 |
| M x D          | ns             | ns    | ns     | 0.01   | 0.0001 | 0.01 | ns    |
